# Supplementary material for: Molecular design of two-dimensional donor–acceptor covalent organic frameworks for intramolecular singlet fission
Source: Royal Society of Chemistry journal article supplement (doi:10.1039/d3cc01554h), 2023-01-01
Supplement: d3cc01554h1.pdf [file d3cc01554h1.pdf]

- Supporting Information -

## Molecular design of two-dimensional donor-acceptor covalent organic frameworks for intramolecular singlet fission

Maria Fumanal

Departament de Ciència de Materials i Química Física and IQTCUB, Facultat de Química, Universitat de Barcelona, Martí i Franquès 1, E-08028 Barcelona, Spain.

[mfumanal@ub.edu](mailto:mfumanal@ub.edu)

## Section S1. Monomers characterization

**Table S1.1**  $S_1$ ,  $T_1$ , HOMO and LUMO energies (in eV) obtained at DFT and TDDFT(TDA) level with  $\omega$ b97xd/6-31g\* for selected acceptors as previously reported.<sup>1</sup>

| Acceptors_R1 | $S_1$  | $T_1$  | HOMO     | LUMO     |
|--------------|--------|--------|----------|----------|
| DPP_OMe      | 3.684  | 1.7695 | -7.68939 | -0.66205 |
| DPP_Me       | 3.8528 | 1.7786 | -7.45592 | -0.39701 |
| II_COOMe     | 3.1111 | 1.7845 | -7.80858 | -1.39921 |
| DPP_H        | 4.0952 | 1.8454 | -7.68041 | -0.48762 |
| II_H         | 3.1899 | 1.9691 | -7.59742 | -1.02831 |
| II_Me        | 3.1298 | 1.9733 | -7.49265 | -0.95076 |
| II_OMe       | 3.1683 | 2.042  | -7.66436 | -1.08002 |
| DPP_COOMe    | 4.1485 | 2.0824 | -8.29403 | -0.83239 |

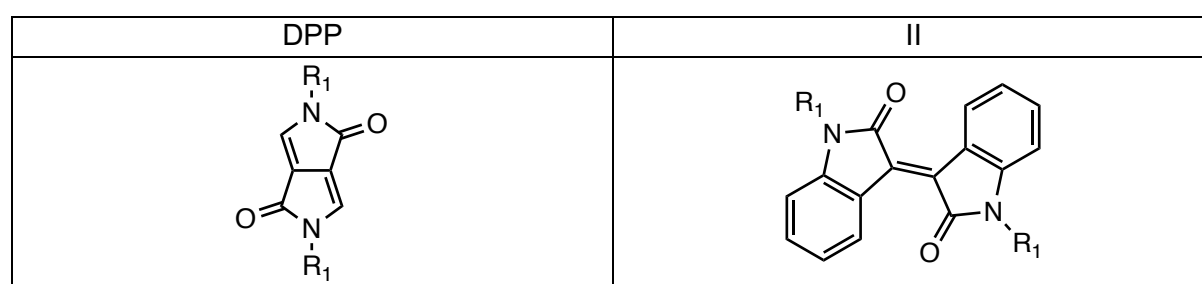

**Figure S1.1** Molecular structure of selected DPP (diketopyrrolopyrrole) and II (isoindigo) acceptors.

**Table S1.2**  $S_1$ ,  $T_1$ , HOMO and LUMO energies (in eV) obtained at DFT and TDDFT(TDA) level with  $\omega$ b97xd/6-31g\* for selected donors as previously reported.<sup>1</sup>

| Donors_R1_R2           | $S_1$  | $T_1$  | HOMO     | LUMO    |
|------------------------|--------|--------|----------|---------|
| 2,2'-bithiophene_H_OH  | 4.519  | 2.7303 | -6.72094 | 1.10505 |
| BDT_OMe_OH             | 4.2371 | 2.8725 | -6.77346 | 0.80191 |
| 2,2'-bithiophene_OH_OH | 4.622  | 2.8086 | -6.77482 | 1.1573  |
| BDT_H_OH               | 4.3288 | 2.955  | -6.82271 | 0.86804 |

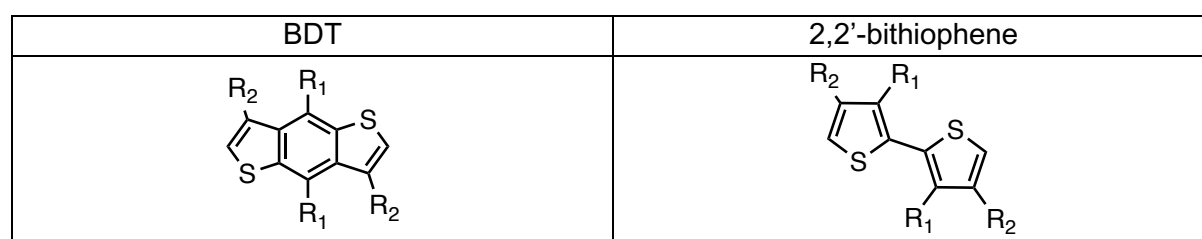

**Figure S1.2** Molecular structure of selected BDT (benzodithiophene) and 2,2'-bithiophene donors.

<sup>1</sup> J. T. Blaskovits, M. Fumanal, S. Vela, R. Fabregat, C. Corminboeuf, *Chem. Mater.* 2021, **33**, 2567.

## Section S2. Tetramer model excited state characterization

**Table S2.1** Excited state characterization of  $S_1$  and  $T_1$  of the DPP-BDT-DPP-TTE tetramer obtained at  $\omega b97xD/6-31g^*$  level using the  $\omega b97xD/6-31g^*$  optimized geometry in gas phase.

$S_1$  2.600 eV

|                         |                                      |                                      |
|-------------------------|--------------------------------------|--------------------------------------|
| A→A 0.225               | A→D <sub>1</sub> 0.086               | A→D <sub>2</sub> 0.048               |
| D <sub>1</sub> →A 0.222 | D <sub>1</sub> →D <sub>1</sub> 0.144 | D <sub>1</sub> →D <sub>2</sub> 0.022 |
| D <sub>2</sub> →A 0.109 | D <sub>2</sub> →D <sub>1</sub> 0.023 | D <sub>2</sub> →D <sub>2</sub> 0.113 |

$T_1$  1.486 eV

|                         |                                      |                                      |
|-------------------------|--------------------------------------|--------------------------------------|
| A→A 0.454               | A→D <sub>1</sub> 0.096               | A→D <sub>2</sub> 0.077               |
| D <sub>1</sub> →A 0.095 | D <sub>1</sub> →D <sub>1</sub> 0.061 | D <sub>1</sub> →D <sub>2</sub> 0.013 |
| D <sub>2</sub> →A 0.102 | D <sub>2</sub> →D <sub>1</sub> 0.017 | D <sub>2</sub> →D <sub>2</sub> 0.081 |

**Table S2.2** Excited state characterization of  $S_1$  and  $T_1$  of the DPP-BDT-DPP-TTE tetramer obtained at  $\omega b97xD/6-31g^*$  level using the PBE-D3 optimized geometry of the Kagome lattice.

$S_1$  2.306 eV

|                         |                                      |                                      |
|-------------------------|--------------------------------------|--------------------------------------|
| A→A 0.211               | A→D <sub>1</sub> 0.102               | A→D <sub>2</sub> 0.054               |
| D <sub>1</sub> →A 0.162 | D <sub>1</sub> →D <sub>1</sub> 0.127 | D <sub>1</sub> →D <sub>2</sub> 0.020 |
| D <sub>2</sub> →A 0.123 | D <sub>2</sub> →D <sub>1</sub> 0.034 | D <sub>2</sub> →D <sub>2</sub> 0.157 |

$T_1$  1.235 eV

|                         |                                      |                                      |
|-------------------------|--------------------------------------|--------------------------------------|
| A→A 0.389               | A→D <sub>1</sub> 0.114               | A→D <sub>2</sub> 0.076               |
| D <sub>1</sub> →A 0.094 | D <sub>1</sub> →D <sub>1</sub> 0.077 | D <sub>1</sub> →D <sub>2</sub> 0.014 |
| D <sub>2</sub> →A 0.101 | D <sub>2</sub> →D <sub>1</sub> 0.023 | D <sub>2</sub> →D <sub>2</sub> 0.108 |

**Table S3.2** Excited state characterization of  $S_1$  and  $T_1$  of the DPP-BDT-DPP-TTE tetramer obtained at  $\omega b97xd/6-31g^*$  level using the PBE-D3 optimized geometry of the Rhombic lattice.

$S_1$  2.120 eV

|                         |                                      |                                      |
|-------------------------|--------------------------------------|--------------------------------------|
| A→A 0.161               | A→D <sub>1</sub> 0.087               | A→D <sub>2</sub> 0.042               |
| D <sub>1</sub> →A 0.226 | D <sub>1</sub> →D <sub>1</sub> 0.195 | D <sub>1</sub> →D <sub>2</sub> 0.029 |
| D <sub>2</sub> →A 0.093 | D <sub>2</sub> →D <sub>1</sub> 0.029 | D <sub>2</sub> →D <sub>2</sub> 0.131 |

$T_1$  1.162 eV

|                         |                                      |                                      |
|-------------------------|--------------------------------------|--------------------------------------|
| A→A 0.284               | A→D <sub>1</sub> 0.116               | A→D <sub>2</sub> 0.057               |
| D <sub>1</sub> →A 0.132 | D <sub>1</sub> →D <sub>1</sub> 0.139 | D <sub>1</sub> →D <sub>2</sub> 0.017 |
| D <sub>2</sub> →A 0.085 | D <sub>2</sub> →D <sub>1</sub> 0.026 | D <sub>2</sub> →D <sub>2</sub> 0.140 |

### Section S3. Optimized unit cell characterization

**Table S3.** Cell parameters of the optimized Kagome and rhombic unit cells.

|                                       | Kagome            | Rhombic                        |
|---------------------------------------|-------------------|--------------------------------|
| a                                     | 55.752852         | 44.378063                      |
| b                                     | 56.015658         | 31.523305                      |
| c                                     | 21.726400         | 22.000000                      |
| $\alpha$                              | 90.910405         | 90.000000                      |
| $\beta$                               | 90.950982         | 90.000000                      |
| $\gamma$                              | 120.110730        | 88.623700                      |
| PBE-D3 total energy (a.u.)            | -3506.5930861147  | -3506.33134281630 <sup>a</sup> |
| S <sub>1</sub> energy (eV) (tetramer) | 1.20708 (1.44129) | 1.18289 (1.58054)              |
| T <sub>1</sub> energy (eV) (tetramer) | 0.54586 (0.40297) | 0.54364 (0.53335)              |

<sup>a</sup> Multiplied by 1.5 to be comparable to the Kagome unit cell

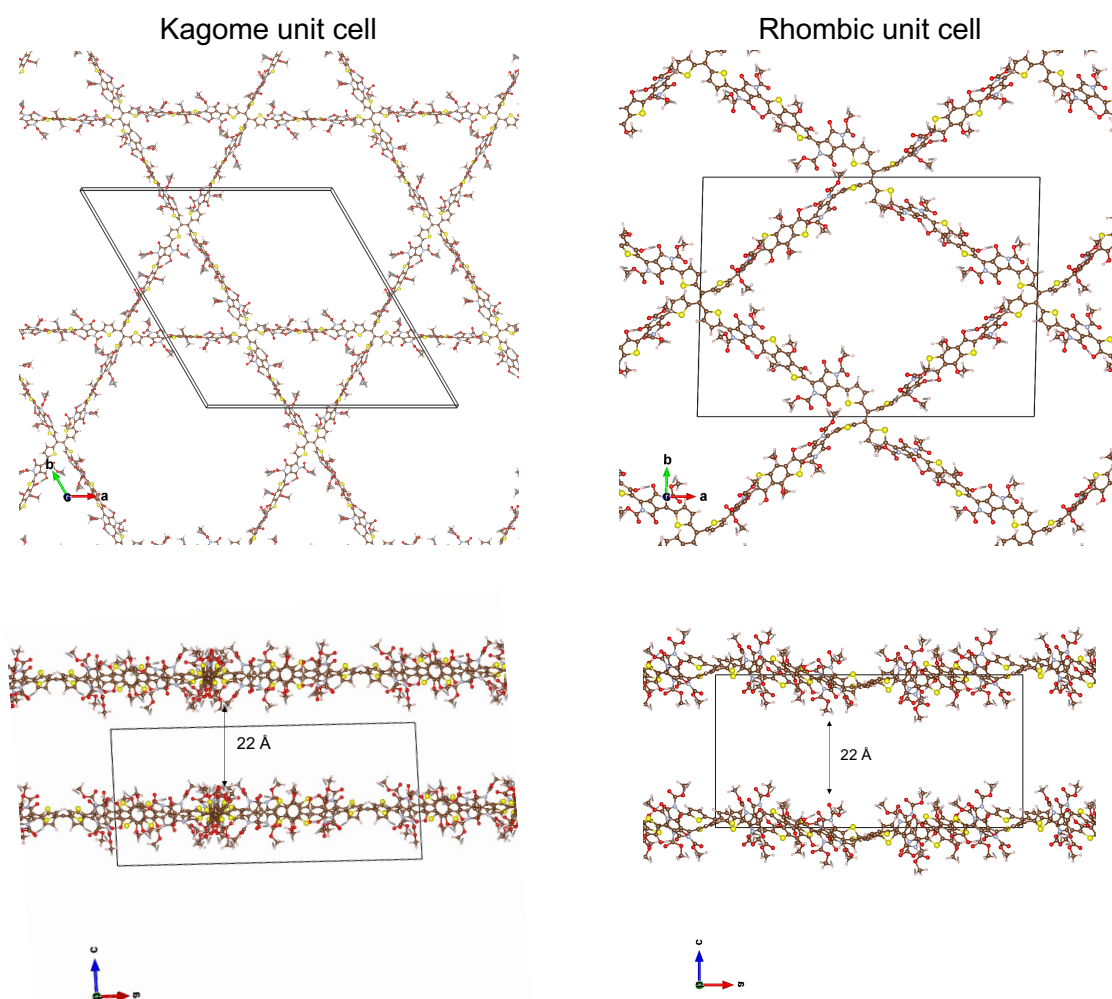

**Figure S3.** Representation of the front and side view of the Kagome and rhombic 2D COF monolayers.

## Cif file of the optimized Kagome monolayer

data\_crystal

\_cell\_length\_a 55.75285  
\_cell\_length\_b 56.01566  
\_cell\_length\_c 21.72640  
\_cell\_angle\_alpha 90.91040  
\_cell\_angle\_beta 90.95098  
\_cell\_angle\_gamma 120.11073

\_symmetry\_space\_group\_name\_Hall 'P 1'  
\_symmetry\_space\_group\_name\_H-M 'P 1'

loop\_

\_symmetry\_equiv\_pos\_as\_xyz  
'x,y,z'

loop\_

\_atom\_site\_label  
\_atom\_site\_type\_symbol  
\_atom\_site\_fract\_x  
\_atom\_site\_fract\_y  
\_atom\_site\_fract\_z

|   |   |          |          |         |
|---|---|----------|----------|---------|
| C | C | 0.31778  | 0.32058  | 0.36127 |
| C | C | 0.34193  | -0.16703 | 0.37199 |
| C | C | 0.83017  | 0.34575  | 0.37476 |
| C | C | 0.34176  | 0.34670  | 0.36136 |
| C | C | 0.31773  | -0.16543 | 0.37209 |
| C | C | 0.82947  | 0.32074  | 0.37555 |
| C | C | 0.28936  | 0.31559  | 0.36330 |
| C | C | 0.34019  | 0.80607  | 0.38009 |
| C | C | -0.14340 | 0.37190  | 0.36690 |
| C | C | 0.37021  | 0.35161  | 0.36381 |
| C | C | 0.31997  | -0.13820 | 0.38037 |
| C | C | 0.80289  | 0.29428  | 0.36932 |
| C | C | 0.26748  | 0.29599  | 0.32558 |
| C | C | -0.13576 | 0.38527  | 0.31122 |
| C | C | 0.39111  | 0.36984  | 0.32552 |
| C | C | 0.79428  | 0.27849  | 0.31489 |
| C | C | 0.24253  | 0.29589  | 0.33217 |
| C | C | -0.11086 | 0.41057  | 0.31522 |
| C | C | 0.41623  | 0.37015  | 0.33295 |
| C | C | 0.76893  | 0.25400  | 0.31967 |
| C | C | 0.24401  | 0.31479  | 0.37735 |
| C | C | 0.34005  | 0.76152  | 0.36606 |
| C | C | -0.09918 | 0.41755  | 0.37502 |
| C | C | 0.41592  | 0.35289  | 0.37938 |
| C | C | 0.31996  | -0.09384 | 0.36669 |
| C | C | 0.75777  | 0.25023  | 0.37858 |
| C | C | 0.33008  | 0.76434  | 0.42318 |
| C | C | 0.33286  | -0.09471 | 0.42218 |
| C | C | 0.32997  | 0.78913  | 0.43044 |
| C | C | 0.33299  | -0.11941 | 0.42927 |
| C | C | 0.32002  | 0.29593  | 0.35165 |
| C | C | 0.36998  | -0.14374 | 0.36901 |
| C | C | 0.80627  | 0.34972  | 0.37558 |
| C | C | 0.33950  | 0.37122  | 0.35180 |
| C | C | 0.28965  | 0.81113  | 0.36927 |
| C | C | -0.14658 | 0.31686  | 0.37675 |
| C | C | 0.39341  | -0.14308 | 0.39571 |
| C | C | 0.80726  | 0.37371  | 0.39916 |
| C | C | 0.26665  | 0.81142  | 0.39389 |
| C | C | -0.14678 | 0.29405  | 0.40318 |
| C | C | 0.41804  | -0.11822 | 0.38851 |

|   |   |          |          |         |
|---|---|----------|----------|---------|
| C | C | 0.78193  | 0.37300  | 0.39554 |
| C | C | 0.24207  | 0.78614  | 0.38859 |
| C | C | -0.12173 | 0.29432  | 0.39897 |
| C | C | 0.31733  | 0.24995  | 0.36003 |
| C | C | 0.41459  | -0.09921 | 0.35357 |
| C | C | 0.76077  | 0.34882  | 0.36614 |
| C | C | 0.34319  | 0.41775  | 0.36069 |
| C | C | 0.24511  | 0.76552  | 0.35783 |
| C | C | -0.10182 | 0.31674  | 0.36616 |
| C | C | 0.33515  | 0.26657  | 0.31417 |
| C | C | 0.32373  | 0.40006  | 0.31538 |
| C | C | 0.33663  | 0.29209  | 0.30997 |
| C | C | 0.32172  | 0.37426  | 0.31089 |
| H | H | 0.27032  | 0.28280  | 0.29286 |
| H | H | 0.22373  | 0.28301  | 0.30474 |
| H | H | 0.34627  | 0.25958  | 0.28512 |
| H | H | 0.34947  | 0.30779  | 0.27776 |
| H | H | 0.32366  | 0.74874  | 0.45805 |
| H | H | 0.32241  | 0.79482  | 0.47064 |
| H | H | 0.39195  | -0.16034 | 0.42087 |
| H | H | 0.43803  | -0.11344 | 0.40829 |
| H | H | -0.14829 | 0.37654  | 0.26925 |
| H | H | -0.10112 | 0.42385  | 0.27653 |
| H | H | 0.82617  | 0.39097  | 0.41886 |
| H | H | 0.77832  | 0.38910  | 0.41370 |
| H | H | 0.38744  | 0.38189  | 0.29188 |
| H | H | 0.43433  | 0.38207  | 0.30532 |
| H | H | 0.31181  | 0.40649  | 0.28696 |
| H | H | 0.30766  | 0.35779  | 0.27906 |
| H | H | 0.34150  | -0.07766 | 0.45589 |
| H | H | 0.34250  | -0.12374 | 0.46831 |
| H | H | 0.26841  | 0.82969  | 0.41649 |
| H | H | 0.22247  | 0.78202  | 0.40755 |
| H | H | 0.80627  | 0.28493  | 0.27334 |
| H | H | 0.75875  | 0.23889  | 0.28213 |
| H | H | -0.16491 | 0.27802  | 0.42536 |
| H | H | -0.11755 | 0.27903  | 0.41875 |
| C | C | 0.31314  | 0.22321  | 0.37310 |
| C | C | 0.32416  | 0.20907  | 0.34161 |
| N | N | 0.29627  | 0.20492  | 0.41879 |
| C | C | 0.31501  | 0.18298  | 0.36816 |
| C | C | 0.34001  | 0.21113  | 0.28788 |
| C | C | 0.29719  | 0.17973  | 0.41751 |
| C | C | 0.28225  | 0.20963  | 0.46770 |
| C | C | 0.32426  | 0.16779  | 0.33473 |
| N | N | 0.33923  | 0.18445  | 0.28543 |
| O | O | 0.35273  | 0.22958  | 0.25160 |
| O | O | 0.28573  | 0.16123  | 0.45572 |
| O | O | 0.25800  | 0.19437  | 0.47799 |
| O | O | 0.30059  | 0.23262  | 0.50035 |
| C | C | 0.36272  | 0.18390  | 0.26081 |
| C | C | 0.28821  | 0.24037  | 0.54962 |
| O | O | 0.37920  | 0.18076  | 0.29184 |
| O | O | 0.36316  | 0.18811  | 0.20004 |
| H | H | 0.27877  | 0.22370  | 0.58259 |
| H | H | 0.30543  | 0.25903  | 0.57116 |
| H | H | 0.27238  | 0.24452  | 0.53046 |
| C | C | 0.38766  | 0.19093  | 0.17038 |
| H | H | 0.38814  | 0.17166  | 0.17377 |
| H | H | 0.38545  | 0.19531  | 0.12240 |
| H | H | 0.40647  | 0.20796  | 0.19232 |
| C | C | 0.31729  | -0.07050 | 0.35054 |
| C | C | 0.32452  | -0.04709 | 0.38766 |
| N | N | 0.30507  | -0.06704 | 0.29567 |
| C | C | 0.33463  | -0.03591 | 0.44956 |
| C | C | 0.31749  | -0.02912 | 0.35676 |

|   |   |         |          |         |
|---|---|---------|----------|---------|
| C | C | 0.30481 | -0.04121 | 0.29834 |
| C | C | 0.29923 | -0.08288 | 0.23995 |
| N | N | 0.33301 | -0.01061 | 0.45138 |
| O | O | 0.34380 | -0.04296 | 0.49276 |
| C | C | 0.32277 | -0.00656 | 0.39512 |
| O | O | 0.29636 | -0.03248 | 0.25565 |
| O | O | 0.31265 | -0.09326 | 0.22220 |
| O | O | 0.27699 | -0.08451 | 0.21098 |
| C | C | 0.35003 | 0.01045  | 0.49642 |
| C | C | 0.27088 | -0.09788 | 0.15015 |
| O | O | 0.34681 | 0.00759  | 0.55133 |
| O | O | 0.37022 | 0.03244  | 0.46733 |
| H | H | 0.26614 | -0.11931 | 0.15381 |
| H | H | 0.25284 | -0.09696 | 0.13279 |
| H | H | 0.28864 | -0.08665 | 0.12044 |
| C | C | 0.38692 | 0.05625  | 0.50800 |
| H | H | 0.39689 | 0.05081  | 0.54474 |
| H | H | 0.40232 | 0.07186  | 0.47846 |
| H | H | 0.37369 | 0.06348  | 0.52817 |
| C | C | 0.31913 | 0.14048  | 0.34100 |
| C | C | 0.31453 | 0.12569  | 0.39611 |
| S | S | 0.32054 | 0.12200  | 0.27628 |
| C | C | 0.31550 | 0.10070  | 0.38675 |
| O | O | 0.31117 | 0.13343  | 0.45205 |
| C | C | 0.31779 | 0.09589  | 0.32293 |
| C | C | 0.31411 | 0.08111  | 0.42941 |
| H | H | 0.30106 | 0.14461  | 0.45220 |
| C | C | 0.31723 | 0.07241  | 0.29904 |
| C | C | 0.31419 | 0.05790  | 0.40547 |
| O | O | 0.31251 | 0.08295  | 0.49220 |
| C | C | 0.31561 | 0.05273  | 0.34141 |
| O | O | 0.31999 | 0.07103  | 0.23668 |
| S | S | 0.31337 | 0.03245  | 0.45168 |
| C | C | 0.33732 | 0.10475  | 0.52326 |
| C | C | 0.31707 | 0.02807  | 0.33109 |
| C | C | 0.29508 | 0.05064  | 0.20325 |
| C | C | 0.31753 | 0.01556  | 0.38688 |
| H | H | 0.35535 | 0.10269  | 0.51197 |
| H | H | 0.34091 | 0.12518  | 0.51092 |
| H | H | 0.33337 | 0.10171  | 0.57256 |
| O | O | 0.31995 | 0.02057  | 0.27428 |
| H | H | 0.28902 | 0.02970  | 0.21746 |
| H | H | 0.27813 | 0.05494  | 0.21038 |
| H | H | 0.30052 | 0.05289  | 0.15462 |
| H | H | 0.31115 | -0.00041 | 0.26814 |
| C | C | 0.43943 | 0.34984  | 0.39431 |
| C | C | 0.46184 | 0.35578  | 0.35693 |
| N | N | 0.44421 | 0.33888  | 0.44886 |
| C | C | 0.48046 | 0.34927  | 0.38773 |
| C | C | 0.47106 | 0.36333  | 0.29446 |
| C | C | 0.46996 | 0.33852  | 0.44639 |
| C | C | 0.43034 | 0.33365  | 0.50566 |
| C | C | 0.50144 | 0.35214  | 0.34890 |
| N | N | 0.49566 | 0.36003  | 0.29169 |
| O | O | 0.46341 | 0.37202  | 0.25167 |
| O | O | 0.48008 | 0.33174  | 0.48943 |
| O | O | 0.42514 | 0.31405  | 0.53707 |
| O | O | 0.42502 | 0.35419  | 0.51903 |
| C | C | 0.52377 | 0.34704  | 0.35761 |
| C | C | 0.51723 | 0.37799  | 0.25157 |
| C | C | 0.40888 | 0.34962  | 0.57401 |
| C | C | 0.53907 | 0.34995  | 0.41286 |
| S | S | 0.53766 | 0.33910  | 0.29338 |
| O | O | 0.53934 | 0.39710  | 0.27002 |
| O | O | 0.50829 | 0.37044  | 0.19284 |
| H | H | 0.42028 | 0.34842  | 0.61433 |

|   |   |         |          |         |
|---|---|---------|----------|---------|
| H | H | 0.40592 | 0.36746  | 0.57803 |
| H | H | 0.38889 | 0.33040  | 0.56857 |
| C | C | 0.56417 | 0.34942  | 0.40147 |
| O | O | 0.53309 | 0.35410  | 0.46989 |
| C | C | 0.56537 | 0.34260  | 0.33830 |
| C | C | 0.52734 | 0.38903  | 0.14795 |
| C | C | 0.58660 | 0.35448  | 0.44197 |
| H | H | 0.51216 | 0.34532  | 0.47647 |
| C | C | 0.58614 | 0.33851  | 0.31441 |
| H | H | 0.54709 | 0.38922  | 0.15126 |
| H | H | 0.51692 | 0.38065  | 0.10321 |
| H | H | 0.53099 | 0.40997  | 0.15620 |
| C | C | 0.60757 | 0.35078  | 0.41775 |
| O | O | 0.58949 | 0.36273  | 0.50294 |
| C | C | 0.60788 | 0.34228  | 0.35548 |
| O | O | 0.58518 | 0.33326  | 0.25210 |
| S | S | 0.63681 | 0.35714  | 0.46100 |
| C | C | 0.59358 | 0.39016  | 0.51414 |
| C | C | 0.63259 | 0.34094  | 0.34412 |
| C | C | 0.57678 | 0.30490  | 0.23488 |
| C | C | 0.65113 | 0.35035  | 0.39579 |
| H | H | 0.61114 | 0.40536  | 0.48785 |
| H | H | 0.57474 | 0.39085  | 0.50231 |
| H | H | 0.59836 | 0.39438  | 0.56360 |
| O | O | 0.63702 | 0.33339  | 0.28886 |
| H | H | 0.59200 | 0.29948  | 0.25207 |
| H | H | 0.55613 | 0.29075  | 0.25241 |
| H | H | 0.57601 | 0.30403  | 0.18442 |
| C | C | 0.67921 | 0.35661  | 0.39740 |
| H | H | 0.64863 | 0.32377  | 0.29039 |
| C | C | 0.69275 | 0.34531  | 0.36456 |
| N | N | 0.69910 | 0.37583  | 0.43985 |
| C | C | 0.72090 | 0.35735  | 0.38542 |
| C | C | 0.68642 | 0.32318  | 0.32167 |
| C | C | 0.72613 | 0.37758  | 0.43449 |
| C | C | 0.69767 | 0.39779  | 0.47122 |
| C | C | 0.73309 | 0.34362  | 0.35679 |
| N | N | 0.71183 | 0.32241  | 0.31866 |
| O | O | 0.66518 | 0.30818  | 0.28924 |
| O | O | 0.70085 | 0.40170  | 0.52640 |
| O | O | 0.69334 | 0.41317  | 0.42983 |
| C | C | 0.71561 | 0.30629  | 0.27207 |
| C | C | 0.68865 | 0.43420  | 0.45780 |
| O | O | 0.73484 | 0.31558  | 0.23715 |
| O | O | 0.69489 | 0.27999  | 0.27410 |
| H | H | 0.70658 | 0.44847  | 0.48701 |
| H | H | 0.68572 | 0.44481  | 0.41909 |
| H | H | 0.67000 | 0.42429  | 0.48554 |
| C | C | 0.69608 | 0.26181  | 0.22690 |
| H | H | 0.71456 | 0.25997  | 0.23498 |
| H | H | 0.67712 | 0.24195  | 0.23200 |
| H | H | 0.69675 | 0.27004  | 0.18111 |
| C | C | 0.43698 | -0.07209 | 0.34196 |
| C | C | 0.46192 | -0.05766 | 0.37599 |
| N | N | 0.43821 | -0.05370 | 0.29589 |
| C | C | 0.47865 | -0.03119 | 0.35093 |
| C | C | 0.47487 | -0.05893 | 0.43354 |
| C | C | 0.46415 | -0.02793 | 0.30001 |
| C | C | 0.41975 | -0.05875 | 0.24492 |
| C | C | 0.50207 | -0.01509 | 0.38868 |
| N | N | 0.49970 | -0.03125 | 0.43988 |
| O | O | 0.46960 | -0.07713 | 0.47029 |
| O | O | 0.47118 | -0.00885 | 0.26315 |
| O | O | 0.41462 | -0.04158 | 0.22580 |
| O | O | 0.41015 | -0.08459 | 0.22179 |
| C | C | 0.52386 | 0.01253  | 0.38339 |



|   |   |         |          |         |
|---|---|---------|----------|---------|
| C | C | 0.52338 | -0.02911 | 0.47284 |
| C | C | 0.38822 | -0.09303 | 0.17465 |
| C | C | 0.53464 | 0.02723  | 0.32851 |
| S | S | 0.54271 | 0.03140  | 0.44980 |
| O | O | 0.54381 | -0.02664 | 0.44808 |
| O | O | 0.51852 | -0.03109 | 0.53337 |
| H | H | 0.39611 | -0.07947 | 0.13523 |
| H | H | 0.38239 | -0.11425 | 0.16169 |
| H | H | 0.37053 | -0.09218 | 0.19362 |
| C | C | 0.56028 | 0.05263  | 0.34039 |
| O | O | 0.52441 | 0.01916  | 0.27120 |
| C | C | 0.56668 | 0.05752  | 0.40484 |
| C | C | 0.54016 | -0.03173 | 0.57061 |
| C | C | 0.57889 | 0.07261  | 0.29958 |
| H | H | 0.50294 | 0.00785  | 0.26869 |
| C | C | 0.58947 | 0.08099  | 0.43075 |
| H | H | 0.55991 | -0.01248 | 0.56567 |
| H | H | 0.53308 | -0.03395 | 0.61790 |
| H | H | 0.54242 | -0.04931 | 0.55597 |
| C | C | 0.60179 | 0.09602  | 0.32548 |
| O | O | 0.57617 | 0.07108  | 0.23659 |
| C | C | 0.60797 | 0.10104  | 0.39002 |
| O | O | 0.59276 | 0.08173  | 0.49355 |
| S | S | 0.62643 | 0.12193  | 0.28086 |
| C | C | 0.58003 | 0.04993  | 0.20675 |
| C | C | 0.63406 | 0.12594  | 0.40212 |
| C | C | 0.58887 | 0.10234  | 0.52609 |
| C | C | 0.64716 | 0.13891  | 0.34721 |
| H | H | 0.60026 | 0.05251  | 0.22070 |
| H | H | 0.56325 | 0.02922  | 0.21752 |
| H | H | 0.57957 | 0.05323  | 0.15727 |
| O | O | 0.64445 | 0.13333  | 0.45935 |
| H | H | 0.60463 | 0.12325  | 0.51367 |
| H | H | 0.56793 | 0.09883  | 0.51617 |
| H | H | 0.59121 | 0.09938  | 0.57509 |
| C | C | 0.67433 | 0.16173  | 0.34132 |
| H | H | 0.65627 | 0.15445  | 0.46694 |
| C | C | 0.69102 | 0.18422  | 0.38125 |
| N | N | 0.68901 | 0.16692  | 0.28634 |
| C | C | 0.71602 | 0.20327  | 0.35254 |
| C | C | 0.69003 | 0.19508  | 0.44019 |
| C | C | 0.71551 | 0.19296  | 0.29037 |
| C | C | 0.68489 | 0.14657  | 0.23977 |
| C | C | 0.73188 | 0.22612  | 0.39214 |
| N | N | 0.71586 | 0.22115  | 0.44586 |
| O | O | 0.67262 | 0.18523  | 0.48151 |
| O | O | 0.73178 | 0.20137  | 0.24804 |
| O | O | 0.68302 | 0.14964  | 0.18523 |
| O | O | 0.68450 | 0.12471  | 0.26659 |
| C | C | 0.72466 | 0.23748  | 0.50126 |
| C | C | 0.67728 | 0.10159  | 0.22412 |
| O | O | 0.74834 | 0.24888  | 0.52221 |
| O | O | 0.70337 | 0.23847  | 0.52600 |
| H | H | 0.69211 | 0.10803  | 0.18683 |
| H | H | 0.67817 | 0.08597  | 0.25205 |
| H | H | 0.65626 | 0.09388  | 0.20483 |
| C | C | 0.70962 | 0.25271  | 0.58589 |
| H | H | 0.72551 | 0.27446  | 0.58154 |
| H | H | 0.68994 | 0.25064  | 0.60004 |
| H | H | 0.71695 | 0.24288  | 0.61855 |
| C | C | 0.34845 | 0.44507  | 0.37377 |
| C | C | 0.33690 | 0.45879  | 0.34277 |
| N | N | 0.36735 | 0.46450  | 0.41854 |
| C | C | 0.34778 | 0.48592  | 0.36838 |
| C | C | 0.31860 | 0.45515  | 0.29077 |
| C | C | 0.36728 | 0.49010  | 0.41689 |

|   |   |         |         |         |
|---|---|---------|---------|---------|
| C | C | 0.38239 | 0.46047 | 0.46740 |
| C | C | 0.33720 | 0.50021 | 0.33564 |
| N | N | 0.31992 | 0.48184 | 0.28817 |
| O | O | 0.30370 | 0.43564 | 0.25565 |
| O | O | 0.38080 | 0.50967 | 0.45455 |
| O | O | 0.40703 | 0.47527 | 0.47771 |
| O | O | 0.36450 | 0.43851 | 0.50012 |
| C | C | 0.34260 | 0.52776 | 0.34088 |
| C | C | 0.29601 | 0.48199 | 0.26201 |
| C | C | 0.37779 | 0.43131 | 0.54883 |
| C | C | 0.35210 | 0.54564 | 0.39383 |
| S | S | 0.33515 | 0.54260 | 0.27776 |
| O | O | 0.27851 | 0.48296 | 0.29256 |
| O | O | 0.29630 | 0.48000 | 0.20035 |
| H | H | 0.38895 | 0.44881 | 0.58145 |
| H | H | 0.36080 | 0.41366 | 0.57095 |
| H | H | 0.39232 | 0.42569 | 0.52900 |
| C | C | 0.35084 | 0.57043 | 0.38442 |
| O | O | 0.35988 | 0.54087 | 0.44822 |
| C | C | 0.34194 | 0.57127 | 0.32286 |
| C | C | 0.27166 | 0.47749 | 0.16962 |
| C | C | 0.35714 | 0.59305 | 0.42511 |
| H | H | 0.36825 | 0.52797 | 0.44807 |
| C | C | 0.33921 | 0.59287 | 0.29972 |
| H | H | 0.27028 | 0.49601 | 0.17961 |
| H | H | 0.27453 | 0.47542 | 0.12056 |
| H | H | 0.25307 | 0.45920 | 0.18562 |
| C | C | 0.35449 | 0.61472 | 0.40193 |
| O | O | 0.36600 | 0.59553 | 0.48538 |
| C | C | 0.34550 | 0.61542 | 0.34042 |
| O | O | 0.32894 | 0.58972 | 0.24044 |
| S | S | 0.36095 | 0.64348 | 0.44670 |
| C | C | 0.34499 | 0.57724 | 0.52721 |
| C | C | 0.34276 | 0.63937 | 0.33152 |
| C | C | 0.34891 | 0.60742 | 0.19607 |
| C | C | 0.34885 | 0.65579 | 0.38621 |
| H | H | 0.32711 | 0.58047 | 0.52523 |
| H | H | 0.33843 | 0.55559 | 0.51637 |
| H | H | 0.35493 | 0.58304 | 0.57318 |
| O | O | 0.33329 | 0.64299 | 0.27780 |
| H | H | 0.35610 | 0.62923 | 0.20672 |
| H | H | 0.36652 | 0.60379 | 0.19507 |
| H | H | 0.33775 | 0.60145 | 0.15142 |
| C | C | 0.34421 | 0.67829 | 0.39658 |
| H | H | 0.34101 | 0.66342 | 0.26752 |
| C | C | 0.34378 | 0.69741 | 0.35613 |
| N | N | 0.34088 | 0.68678 | 0.45570 |
| C | C | 0.33976 | 0.71728 | 0.38891 |
| C | C | 0.34931 | 0.70523 | 0.29358 |
| C | C | 0.33768 | 0.71120 | 0.45405 |
| C | C | 0.33235 | 0.67041 | 0.50974 |
| C | C | 0.34215 | 0.73775 | 0.34941 |
| N | N | 0.34841 | 0.73068 | 0.29076 |
| O | O | 0.35264 | 0.69339 | 0.24812 |
| O | O | 0.33329 | 0.72132 | 0.49984 |
| O | O | 0.34380 | 0.67857 | 0.55966 |
| O | O | 0.30948 | 0.64582 | 0.49615 |
| C | C | 0.34789 | 0.74278 | 0.23398 |
| C | C | 0.30073 | 0.62665 | 0.54644 |
| O | O | 0.33190 | 0.75107 | 0.22217 |
| O | O | 0.36730 | 0.74364 | 0.19674 |
| H | H | 0.29618 | 0.63553 | 0.58684 |
| H | H | 0.28212 | 0.60812 | 0.52867 |
| H | H | 0.31721 | 0.62209 | 0.55829 |
| C | C | 0.36594 | 0.75245 | 0.13465 |
| H | H | 0.36951 | 0.77356 | 0.13612 |

|   |   |          |         |         |
|---|---|----------|---------|---------|
| H | H | 0.38238  | 0.75134 | 0.11030 |
| H | H | 0.34558  | 0.73847 | 0.11299 |
| C | C | 0.22089  | 0.31835 | 0.39153 |
| C | C | 0.19713  | 0.31055 | 0.35496 |
| N | N | 0.21795  | 0.33175 | 0.44462 |
| C | C | 0.17941  | 0.31821 | 0.38502 |
| C | C | 0.18579  | 0.30001 | 0.29347 |
| C | C | 0.19207  | 0.33187 | 0.44236 |
| C | C | 0.23359  | 0.33902 | 0.50090 |
| C | C | 0.15674  | 0.31277 | 0.34655 |
| N | N | 0.16053  | 0.30213 | 0.29052 |
| O | O | 0.19265  | 0.29013 | 0.25149 |
| O | O | 0.18369  | 0.34074 | 0.48495 |
| O | O | 0.24021  | 0.36007 | 0.53015 |
| O | O | 0.23867  | 0.31857 | 0.51616 |
| C | C | 0.13452  | 0.31790 | 0.35431 |
| C | C | 0.13763  | 0.28165 | 0.25286 |
| C | C | 0.25660  | 0.32493 | 0.57057 |
| C | C | 0.12203  | 0.31897 | 0.40995 |
| S | S | 0.11727  | 0.32091 | 0.28892 |
| O | O | 0.11712  | 0.26233 | 0.27367 |
| O | O | 0.14356  | 0.28730 | 0.19326 |
| H | H | 0.24710  | 0.32871 | 0.61058 |
| H | H | 0.25864  | 0.30668 | 0.57664 |
| H | H | 0.27688  | 0.34322 | 0.56302 |
| C | C | 0.09656  | 0.31905 | 0.39899 |
| O | O | 0.13063  | 0.31848 | 0.46712 |
| C | C | 0.09201  | 0.32080 | 0.33474 |
| C | C | 0.12308  | 0.26643 | 0.15055 |
| C | C | 0.07659  | 0.31794 | 0.44042 |
| H | H | 0.15185  | 0.32732 | 0.47270 |
| C | C | 0.07000  | 0.32285 | 0.30982 |
| H | H | 0.10297  | 0.26523 | 0.15580 |
| H | H | 0.13121  | 0.27343 | 0.10482 |
| H | H | 0.12101  | 0.24628 | 0.15943 |
| C | C | 0.05430  | 0.31954 | 0.41519 |
| O | O | 0.07719  | 0.31564 | 0.50325 |
| C | C | 0.05040  | 0.32237 | 0.35114 |
| O | O | 0.06806  | 0.32313 | 0.24683 |
| S | S | 0.02762  | 0.31721 | 0.45963 |
| C | C | 0.07313  | 0.28943 | 0.52436 |
| C | C | 0.02492  | 0.32230 | 0.33912 |
| C | C | 0.07468  | 0.34961 | 0.22190 |
| C | C | 0.00941  | 0.31770 | 0.39291 |
| H | H | 0.05370  | 0.27236 | 0.50440 |
| H | H | 0.09072  | 0.28676 | 0.51266 |
| H | H | 0.07168  | 0.29031 | 0.57450 |
| O | O | 0.01744  | 0.32446 | 0.28163 |
| H | H | 0.05976  | 0.35571 | 0.23673 |
| H | H | 0.09591  | 0.36544 | 0.23600 |
| H | H | 0.07315  | 0.34649 | 0.17176 |
| H | H | 0.00556  | 0.33367 | 0.27975 |
| C | C | -0.01856 | 0.31151 | 0.39690 |
| C | C | -0.03418 | 0.31962 | 0.36114 |
| N | N | -0.03559 | 0.29650 | 0.44544 |
| C | C | -0.06086 | 0.30978 | 0.38623 |
| C | C | -0.03060 | 0.33769 | 0.31197 |
| C | C | -0.06292 | 0.29448 | 0.44134 |
| C | C | -0.03226 | 0.27717 | 0.48189 |
| C | C | -0.07481 | 0.32091 | 0.35453 |
| N | N | -0.05617 | 0.33838 | 0.30990 |
| O | O | -0.01164 | 0.34944 | 0.27467 |
| O | O | -0.08142 | 0.28149 | 0.47734 |
| O | O | -0.03270 | 0.27699 | 0.53751 |
| O | O | -0.02961 | 0.25920 | 0.44430 |
| C | C | -0.06389 | 0.34811 | 0.25704 |

|   |   |          |         |         |
|---|---|----------|---------|---------|
| C | C | -0.02313 | 0.24054 | 0.47672 |
| O | O | -0.08601 | 0.33490 | 0.22938 |
| O | O | -0.04305 | 0.37338 | 0.24437 |
| H | H | -0.03964 | 0.22807 | 0.50846 |
| H | H | -0.02152 | 0.22761 | 0.44065 |
| H | H | -0.00336 | 0.25252 | 0.50255 |
| C | C | -0.04768 | 0.38498 | 0.18891 |
| H | H | -0.06526 | 0.38838 | 0.19493 |
| H | H | -0.02844 | 0.40460 | 0.18378 |
| H | H | -0.05177 | 0.37104 | 0.14915 |
| C | C | -0.07392 | 0.44276 | 0.38990 |
| C | C | -0.05602 | 0.46223 | 0.34867 |
| N | N | -0.06117 | 0.45259 | 0.44908 |
| C | C | -0.03276 | 0.48392 | 0.38159 |
| C | C | -0.05222 | 0.46700 | 0.28317 |
| C | C | -0.03530 | 0.47820 | 0.44577 |
| C | C | -0.07206 | 0.44228 | 0.50804 |
| C | C | -0.01400 | 0.50285 | 0.34070 |
| N | N | -0.02538 | 0.49283 | 0.28083 |
| O | O | -0.06655 | 0.45493 | 0.23712 |
| O | O | -0.02082 | 0.49167 | 0.49188 |
| O | O | -0.05923 | 0.43850 | 0.54835 |
| O | O | -0.09791 | 0.43852 | 0.51127 |
| C | C | 0.01245  | 0.52669 | 0.35048 |
| C | C | -0.02148 | 0.51152 | 0.23211 |
| C | C | -0.11175 | 0.42631 | 0.56826 |
| C | C | 0.02206  | 0.54460 | 0.40326 |
| S | S | 0.03645  | 0.53853 | 0.29102 |
| O | O | -0.02079 | 0.53333 | 0.24050 |
| O | O | -0.01928 | 0.50073 | 0.17823 |
| H | H | -0.10017 | 0.44010 | 0.60754 |
| H | H | -0.13238 | 0.42395 | 0.56295 |
| H | H | -0.11316 | 0.40623 | 0.57406 |
| C | C | 0.04791  | 0.56948 | 0.39298 |
| O | O | 0.00893  | 0.54093 | 0.45581 |
| C | C | 0.05815  | 0.56850 | 0.33365 |
| C | C | -0.01757 | 0.51711 | 0.12530 |
| C | C | 0.06412  | 0.59330 | 0.43130 |
| H | H | -0.00286 | 0.52060 | 0.46893 |
| C | C | 0.08328  | 0.58889 | 0.31126 |
| H | H | 0.00108  | 0.53759 | 0.12987 |
| H | H | -0.01652 | 0.50552 | 0.08548 |
| H | H | -0.03603 | 0.51929 | 0.12198 |
| C | C | 0.08940  | 0.61353 | 0.40909 |
| O | O | 0.05765  | 0.59827 | 0.48900 |
| C | C | 0.09975  | 0.61232 | 0.35020 |
| O | O | 0.08913  | 0.58526 | 0.25183 |
| S | S | 0.11130  | 0.64355 | 0.45142 |
| C | C | 0.03391  | 0.60230 | 0.49156 |
| C | C | 0.12565  | 0.63702 | 0.33940 |
| C | C | 0.11115  | 0.57873 | 0.24588 |
| C | C | 0.13395  | 0.65653 | 0.38927 |
| H | H | 0.03699  | 0.61920 | 0.46164 |
| H | H | 0.01467  | 0.58327 | 0.47835 |
| H | H | 0.03317  | 0.60798 | 0.53970 |
| O | O | 0.13793  | 0.64020 | 0.28558 |
| H | H | 0.13102  | 0.59590 | 0.26339 |
| H | H | 0.10588  | 0.55974 | 0.27027 |
| H | H | 0.11231  | 0.57547 | 0.19641 |
| C | C | 0.15612  | 0.68431 | 0.39166 |
| H | H | 0.15931  | 0.65199 | 0.28907 |
| C | C | 0.18100  | 0.69727 | 0.35990 |
| N | N | 0.15735  | 0.70471 | 0.43265 |
| C | C | 0.19704  | 0.72564 | 0.37785 |
| C | C | 0.19702  | 0.69023 | 0.32104 |
| C | C | 0.18234  | 0.73158 | 0.42447 |

|   |   |          |          |         |
|---|---|----------|----------|---------|
| C | C | 0.13420  | 0.70494  | 0.46006 |
| C | C | 0.22293  | 0.73759  | 0.35032 |
| N | N | 0.22301  | 0.71564  | 0.31691 |
| O | O | 0.19113  | 0.66825  | 0.29275 |
| O | O | 0.18662  | 0.75266  | 0.45198 |
| O | O | 0.13324  | 0.70956  | 0.51430 |
| O | O | 0.11527  | 0.70069  | 0.41513 |
| C | C | 0.24344  | 0.71821  | 0.27470 |
| C | C | 0.08959  | 0.69789  | 0.43786 |
| O | O | 0.25342  | 0.73622  | 0.23697 |
| O | O | 0.24907  | 0.69792  | 0.28463 |
| H | H | 0.09388  | 0.71639  | 0.46486 |
| H | H | 0.07691  | 0.69529  | 0.39659 |
| H | H | 0.07939  | 0.67966  | 0.46660 |
| C | C | 0.26758  | 0.69629  | 0.24017 |
| H | H | 0.28690  | 0.71619  | 0.23852 |
| H | H | 0.27131  | 0.68009  | 0.25692 |
| H | H | 0.25728  | 0.69057  | 0.19452 |
| O | O | 0.74661  | 0.39393  | 0.46549 |
| S | S | 0.30208  | 0.26688  | 0.39620 |
| S | S | 0.27765  | 0.33312  | 0.40990 |
| S | S | 0.35921  | 0.40139  | 0.39594 |
| S | S | 0.38310  | 0.33573  | 0.41198 |
| S | S | -0.11465 | 0.33814  | 0.34397 |
| S | S | -0.11980 | 0.39138  | 0.42534 |
| S | S | 0.27939  | 0.77878  | 0.33572 |
| S | S | 0.34990  | 0.79090  | 0.32296 |
| S | S | 0.77316  | 0.32676  | 0.34562 |
| S | S | 0.78011  | 0.27810  | 0.42782 |
| S | S | 0.30767  | -0.12487 | 0.32474 |
| S | S | 0.37973  | -0.11291 | 0.33191 |

## Cif file of the optimized rhombic monolayer

data\_crystal

\_cell\_length\_a 44.37806  
\_cell\_length\_b 31.52331  
\_cell\_length\_c 22.00000  
\_cell\_angle\_alpha 90.00000  
\_cell\_angle\_beta 90.00000  
\_cell\_angle\_gamma 88.62370

\_symmetry\_space\_group\_name\_Hall 'P 1'  
\_symmetry\_space\_group\_name\_H-M 'P 1'

loop\_

\_symmetry\_equiv\_pos\_as\_xyz  
'x,y,z'

loop\_

\_atom\_site\_label  
\_atom\_site\_type\_symbol  
\_atom\_site\_fract\_x  
\_atom\_site\_fract\_y  
\_atom\_site\_fract\_z

|   |   |          |          |          |
|---|---|----------|----------|----------|
| S | S | 0.05777  | 0.55751  | -0.00970 |
| C | C | 0.00632  | 0.51666  | 0.03673  |
| C | C | -0.01420 | 0.55158  | 0.01986  |
| C | C | 0.03776  | 0.52936  | 0.04448  |
| C | C | -0.00778 | 0.59477  | 0.02706  |
| C | C | 0.05353  | 0.52718  | 0.09923  |
| C | C | -0.05645 | 0.60135  | -0.01144 |
| C | C | -0.03106 | 0.62249  | 0.00872  |
| C | C | 0.08058  | 0.54896  | 0.09844  |
| C | C | 0.08634  | 0.56821  | 0.04227  |
| H | H | -0.09614 | 0.49116  | 0.26962  |
| H | H | 0.01303  | 0.60538  | 0.04725  |
| H | H | -0.03040 | 0.65681  | 0.01226  |
| H | H | 0.09507  | 0.55311  | 0.13764  |
| H | H | 0.04452  | 0.51132  | 0.13887  |
| H | H | -0.04366 | 0.52476  | 0.12642  |
| S | S | -0.05044 | 0.54682  | -0.01011 |
| C | C | -0.53374 | -0.03334 | -0.06269 |
| C | C | -0.51420 | 0.05741  | -0.07302 |
| C | C | -0.55182 | -0.03925 | -0.11311 |
| C | C | -0.50480 | 0.09985  | -0.07432 |
| C | C | -0.58074 | -0.05302 | -0.09774 |
| C | C | -0.58515 | -0.05819 | -0.03521 |
| C | C | -0.55672 | 0.11134  | -0.07992 |
| C | C | -0.52830 | 0.12966  | -0.07928 |
| H | H | -0.51385 | -0.10827 | -0.04606 |
| H | H | -0.59800 | -0.05990 | -0.13086 |
| H | H | -0.52514 | 0.16365  | -0.08082 |
| H | H | -0.54419 | -0.03342 | -0.15920 |
| S | S | -0.55276 | -0.04401 | 0.00407  |
| C | C | 0.12096  | 0.39206  | -0.03583 |
| C | C | 0.16072  | 0.33885  | -0.01786 |
| C | C | 0.18736  | 0.31243  | -0.02299 |
| C | C | 0.16531  | 0.38923  | -0.10877 |
| C | C | 0.23865  | 0.27685  | -0.04581 |
| C | C | 0.16447  | 0.44026  | -0.18639 |
| C | C | 0.26582  | 0.26025  | -0.06998 |
| C | C | 0.27790  | 0.22264  | -0.04283 |
| C | C | 0.30400  | 0.19798  | -0.05987 |
| C | C | 0.27132  | 0.30781  | -0.15652 |
| C | C | 0.31228  | 0.16615  | -0.01703 |

|   |   |          |          |          |
|---|---|----------|----------|----------|
| C | C | 0.33940  | 0.14110  | -0.02294 |
| C | C | 0.36548  | 0.15336  | -0.05484 |
| C | C | 0.38737  | 0.11969  | -0.05553 |
| C | C | 0.38022  | 0.19200  | -0.07435 |
| C | C | 0.37705  | 0.08523  | -0.01859 |
| C | C | 0.41464  | 0.13280  | -0.07952 |
| C | C | 0.42614  | 0.19451  | -0.14575 |
| C | C | 0.43388  | 0.25748  | -0.19994 |
| C | C | -0.38739 | 0.09417  | -0.04141 |
| C | C | -0.37499 | 0.11512  | 0.00838  |
| C | C | -0.35008 | 0.13913  | -0.01076 |
| C | C | -0.34637 | 0.13329  | -0.07476 |
| C | C | -0.37571 | 0.09533  | -0.15564 |
| C | C | -0.32969 | 0.05146  | -0.15285 |
| C | C | -0.23885 | 0.22129  | -0.02014 |
| C | C | -0.21096 | 0.19362  | -0.10661 |
| C | C | -0.13885 | 0.33190  | -0.09593 |
| C | C | -0.11136 | 0.31531  | -0.18453 |
| C | C | -0.08514 | -0.37887 | -0.02597 |
| C | C | -0.13424 | -0.35246 | -0.01791 |
| C | C | -0.11794 | -0.32284 | -0.05410 |
| C | C | -0.06657 | -0.33044 | -0.10657 |
| C | C | -0.05204 | -0.28021 | -0.17862 |
| C | C | -0.19367 | -0.30416 | -0.04567 |
| C | C | -0.22105 | -0.27875 | -0.04283 |
| C | C | -0.23278 | -0.24876 | -0.08561 |
| C | C | -0.27802 | -0.24098 | -0.02015 |
| C | C | -0.26098 | -0.22958 | -0.07235 |
| C | C | -0.30740 | -0.22082 | -0.01998 |
| C | C | -0.22789 | -0.22925 | -0.19199 |
| C | C | -0.31192 | -0.19018 | -0.06820 |
| C | C | -0.33856 | -0.16411 | -0.07514 |
| C | C | -0.36166 | -0.15734 | -0.03099 |
| C | C | -0.38630 | -0.13371 | -0.05606 |
| C | C | -0.37990 | -0.12088 | -0.11706 |
| C | C | -0.33392 | -0.13496 | -0.18384 |
| C | C | -0.40973 | -0.12874 | -0.01557 |
| C | C | -0.33540 | -0.10357 | -0.28063 |
| C | C | 0.14350  | -0.35594 | -0.01641 |
| C | C | 0.11015  | -0.39870 | -0.08440 |
| C | C | 0.14032  | -0.46505 | -0.07643 |
| C | C | 0.25466  | -0.27863 | -0.00567 |
| C | C | 0.26831  | -0.31208 | -0.10061 |
| C | C | 0.31281  | -0.18735 | -0.01759 |
| C | C | 0.33656  | -0.16109 | -0.03761 |
| C | C | 0.37278  | -0.10888 | -0.04446 |
| C | C | 0.37629  | -0.13366 | -0.09958 |
| C | C | 0.34285  | -0.18835 | -0.14461 |
| C | C | 0.38899  | -0.07948 | -0.01127 |
| C | C | 0.35917  | -0.22379 | -0.23304 |
| C | C | -0.43906 | -0.10914 | -0.02645 |
| C | C | -0.46694 | -0.12811 | -0.02775 |
| C | C | -0.48133 | -0.05723 | -0.04867 |
| C | C | -0.49054 | -0.09925 | -0.04130 |
| C | C | -0.50178 | -0.02133 | -0.05997 |
| C | C | -0.49394 | 0.02088  | -0.06492 |
| C | C | -0.46287 | 0.03303  | -0.04948 |
| C | C | -0.45326 | 0.03602  | 0.01035  |
| C | C | -0.42537 | 0.05514  | 0.01625  |
| C | C | -0.41338 | 0.06822  | -0.03941 |
| H | H | 0.15031  | 0.46793  | -0.19833 |
| H | H | 0.18801  | 0.44911  | -0.17993 |
| H | H | 0.25010  | 0.29782  | -0.17705 |
| H | H | 0.26807  | 0.33874  | -0.13409 |
| H | H | 0.28865  | 0.31040  | -0.19173 |
| H | H | 0.33364  | 0.18309  | -0.11887 |

|   |   |          |          |          |
|---|---|----------|----------|----------|
| H | H | 0.42582  | 0.24358  | -0.24248 |
| H | H | 0.45853  | 0.25425  | -0.19803 |
| H | H | 0.42656  | 0.29075  | -0.19605 |
| H | H | -0.31280 | 0.07564  | -0.14489 |
| H | H | -0.32094 | 0.02694  | -0.18381 |
| H | H | -0.21627 | 0.22342  | -0.13059 |
| H | H | -0.18726 | 0.19287  | -0.09198 |
| H | H | -0.21477 | 0.16667  | -0.13692 |
| H | H | -0.12494 | 0.28776  | -0.19566 |
| H | H | -0.12045 | 0.34339  | -0.20832 |
| H | H | -0.08767 | 0.30953  | -0.19633 |
| H | H | -0.33667 | 0.03708  | -0.10993 |
| H | H | -0.05381 | -0.30288 | -0.21619 |
| H | H | -0.02869 | -0.28003 | -0.16235 |
| H | H | -0.05973 | -0.24846 | -0.19255 |
| H | H | -0.15575 | -0.29659 | -0.09090 |
| H | H | -0.24734 | -0.24902 | -0.20162 |
| H | H | -0.23461 | -0.19552 | -0.19478 |
| H | H | -0.20995 | -0.23607 | -0.22507 |
| H | H | -0.33237 | -0.13404 | -0.30418 |
| H | H | -0.35097 | -0.08250 | -0.30553 |
| H | H | -0.31341 | -0.08895 | -0.27481 |
| H | H | 0.15146  | -0.45033 | -0.03767 |
| H | H | 0.15723  | -0.47721 | -0.10869 |
| H | H | 0.12598  | -0.49096 | -0.06142 |
| H | H | 0.25815  | -0.28368 | -0.12194 |
| H | H | 0.29295  | -0.31163 | -0.10543 |
| H | H | 0.25974  | -0.34064 | -0.12245 |
| H | H | 0.34340  | -0.24977 | -0.22754 |
| H | H | 0.34903  | -0.19923 | -0.26243 |
| H | H | 0.38068  | -0.23538 | -0.25168 |
| H | H | -0.46977 | -0.16177 | -0.01974 |
| H | H | -0.48138 | 0.10852  | -0.07089 |
| H | H | 0.16331  | 0.41582  | -0.22173 |
| N | N | 0.15128  | 0.37456  | -0.05551 |
| N | N | 0.41042  | 0.17604  | -0.09622 |
| N | N | -0.36915 | 0.10421  | -0.09201 |
| N | N | -0.13524 | 0.34395  | -0.03426 |
| N | N | -0.08777 | -0.34076 | -0.06010 |
| N | N | -0.34905 | -0.14039 | -0.12810 |
| N | N | 0.12078  | -0.38853 | -0.02375 |
| N | N | 0.35335  | -0.16685 | -0.09214 |
| O | O | 0.10738  | 0.42200  | -0.05917 |
| O | O | 0.18699  | 0.37221  | -0.13361 |
| O | O | 0.15183  | 0.42499  | -0.12973 |
| O | O | 0.28322  | 0.27632  | -0.11493 |
| O | O | 0.31661  | 0.20322  | -0.11480 |
| O | O | 0.37215  | 0.22918  | -0.07421 |
| O | O | 0.44229  | 0.17460  | -0.18101 |
| O | O | 0.42038  | 0.23676  | -0.14795 |
| O | O | -0.32777 | 0.14821  | -0.11158 |
| O | O | -0.39810 | 0.10926  | -0.18085 |
| O | O | -0.35548 | 0.07037  | -0.18488 |
| O | O | -0.28507 | 0.15380  | -0.03708 |
| O | O | -0.23105 | 0.18760  | -0.05597 |
| O | O | -0.09255 | 0.38793  | -0.05208 |
| O | O | -0.16290 | 0.33069  | -0.12235 |
| O | O | -0.11137 | 0.32262  | -0.11929 |
| O | O | -0.12598 | -0.28831 | -0.07787 |
| O | O | -0.04623 | -0.35444 | -0.12232 |
| O | O | -0.07227 | -0.29153 | -0.12939 |
| O | O | -0.17798 | -0.30726 | -0.09649 |
| O | O | -0.21477 | -0.23954 | -0.13359 |
| O | O | -0.39447 | -0.09895 | -0.15219 |
| O | O | -0.30934 | -0.15089 | -0.19639 |
| O | O | -0.34985 | -0.10957 | -0.22202 |



|   |   |          |          |          |
|---|---|----------|----------|----------|
| O | O | 0.15561  | -0.33853 | -0.05931 |
| O | O | 0.09273  | -0.37527 | -0.11113 |
| O | O | 0.12191  | -0.43437 | -0.11038 |
| O | O | 0.25952  | -0.31526 | -0.03748 |
| O | O | 0.39235  | -0.13039 | -0.14436 |
| O | O | 0.31654  | -0.19006 | -0.15954 |
| O | O | 0.36663  | -0.20586 | -0.17421 |
| S | S | 0.21917  | 0.32300  | -0.06869 |
| S | S | -0.18444 | 0.26648  | -0.03138 |
| S | S | -0.27989 | -0.19120 | -0.11639 |
| S | S | 0.30774  | -0.23937 | -0.04430 |
| S | S | -0.44219 | -0.05522 | -0.04121 |
| S | S | -0.43697 | 0.05412  | -0.09946 |
| C | C | 0.09040  | 0.36319  | 0.05770  |
| C | C | 0.11357  | 0.36602  | 0.01490  |
| C | C | 0.13729  | 0.33589  | 0.02613  |
| C | C | 0.12974  | 0.31460  | 0.08145  |
| C | C | 0.08692  | 0.31409  | 0.15226  |
| C | C | 0.06283  | 0.33285  | 0.24404  |
| C | C | 0.19248  | 0.27257  | 0.00821  |
| C | C | 0.22222  | 0.25444  | -0.00063 |
| C | C | 0.23556  | 0.21863  | 0.02933  |
| C | C | 0.26403  | 0.20523  | 0.00947  |
| C | C | 0.21831  | 0.21695  | 0.13209  |
| C | C | 0.32753  | 0.06884  | 0.02750  |
| C | C | 0.27728  | 0.05204  | 0.05124  |
| C | C | -0.38207 | 0.12578  | 0.07083  |
| C | C | -0.34044 | 0.16612  | 0.03599  |
| C | C | -0.31654 | 0.19524  | 0.03274  |
| C | C | -0.35815 | 0.17206  | 0.14749  |
| C | C | -0.29001 | 0.18778  | -0.00223 |
| C | C | -0.27811 | 0.25162  | 0.04863  |
| C | C | -0.26771 | 0.21935  | 0.00774  |
| C | C | -0.32552 | 0.19535  | 0.22424  |
| C | C | -0.26038 | 0.28616  | 0.06367  |
| C | C | -0.23190 | 0.28869  | 0.03435  |
| C | C | -0.22129 | 0.25657  | -0.00670 |
| C | C | -0.20997 | 0.32078  | 0.04440  |
| C | C | -0.28220 | 0.30591  | 0.16041  |
| C | C | -0.18274 | 0.31354  | 0.01127  |
| C | C | -0.15751 | 0.34075  | 0.01165  |
| C | C | -0.14814 | 0.36796  | 0.05833  |
| C | C | -0.12155 | 0.38926  | 0.04200  |
| C | C | -0.15529 | 0.37833  | 0.11955  |
| C | C | -0.11251 | 0.37639  | -0.01837 |
| C | C | -0.11168 | 0.41484  | 0.08898  |
| C | C | -0.13105 | 0.42066  | 0.20027  |
| C | C | -0.10205 | 0.45771  | 0.27324  |
| C | C | -0.11345 | -0.38567 | -0.00197 |
| C | C | -0.12560 | -0.41048 | 0.04664  |
| C | C | -0.16133 | -0.35486 | 0.01675  |
| C | C | -0.18773 | -0.32833 | 0.00912  |
| C | C | -0.17306 | -0.40693 | 0.10632  |
| C | C | -0.23691 | -0.28597 | 0.01196  |
| C | C | -0.21834 | -0.39821 | 0.16222  |
| C | C | -0.26546 | -0.26886 | 0.02433  |
| C | C | -0.28220 | -0.24841 | 0.12328  |
| C | C | -0.36910 | -0.16449 | 0.03152  |
| C | C | -0.41492 | -0.15219 | 0.09597  |
| C | C | -0.45770 | -0.13058 | 0.15234  |
| C | C | 0.06187  | 0.38515  | 0.06247  |
| C | C | 0.03652  | 0.37282  | 0.09549  |
| C | C | 0.01887  | 0.43964  | 0.06151  |
| C | C | 0.01298  | 0.40293  | 0.09539  |
| C | C | -0.00208 | 0.47568  | 0.05423  |
| C | C | -0.03353 | 0.46852  | 0.07181  |

|   |   |          |          |          |
|---|---|----------|----------|----------|
| C | C | -0.05157 | 0.49502  | 0.10818  |
| C | C | -0.08069 | 0.48023  | 0.11713  |
| C | C | -0.08560 | 0.44124  | 0.08891  |
| C | C | 0.11021  | -0.40291 | 0.03236  |
| C | C | 0.12634  | -0.38135 | 0.07696  |
| C | C | 0.14687  | -0.35317 | 0.04962  |
| C | C | 0.12373  | -0.37211 | 0.14077  |
| C | C | 0.15903  | -0.32566 | 0.09318  |
| C | C | 0.18316  | -0.29718 | 0.08049  |
| C | C | 0.14750  | -0.31899 | 0.20879  |
| C | C | 0.20684  | -0.30876 | 0.04059  |
| C | C | 0.22146  | -0.23959 | 0.06677  |
| C | C | 0.22887  | -0.27678 | 0.03250  |
| C | C | 0.17455  | -0.27126 | 0.26936  |
| C | C | 0.23971  | -0.20388 | 0.06464  |
| C | C | 0.26616  | -0.20619 | 0.02826  |
| C | C | 0.27327  | -0.24335 | -0.00645 |
| C | C | 0.28926  | -0.17480 | 0.02323  |
| C | C | 0.22599  | -0.16732 | 0.15711  |
| C | C | 0.34954  | -0.12624 | -0.00842 |
| C | C | 0.35114  | -0.10813 | 0.05084  |
| C | C | 0.38164  | -0.05137 | 0.09831  |
| C | C | 0.40601  | 0.01179  | 0.12451  |
| H | H | 0.07812  | 0.31285  | 0.27150  |
| H | H | 0.05667  | 0.36227  | 0.26782  |
| H | H | 0.04272  | 0.31493  | 0.23254  |
| H | H | 0.16037  | 0.26631  | 0.07164  |
| H | H | 0.24036  | 0.22465  | 0.15134  |
| H | H | 0.20424  | 0.24587  | 0.12767  |
| H | H | 0.20693  | 0.19440  | 0.16166  |
| H | H | 0.28379  | 0.04676  | 0.09876  |
| H | H | 0.25535  | 0.06850  | 0.04803  |
| H | H | 0.27714  | 0.02157  | 0.02721  |
| H | H | -0.33369 | 0.17236  | 0.25743  |
| H | H | -0.30127 | 0.19973  | 0.22931  |
| H | H | -0.33799 | 0.22557  | 0.22964  |
| H | H | -0.30689 | 0.30496  | 0.15678  |
| H | H | -0.27329 | 0.27509  | 0.17639  |
| H | H | -0.19995 | 0.35957  | 0.11046  |
| H | H | -0.08358 | 0.43934  | 0.29445  |
| H | H | -0.27610 | 0.33084  | 0.19262  |
| H | H | -0.12295 | 0.45411  | 0.29901  |
| H | H | -0.20733 | -0.39679 | 0.20675  |
| H | H | -0.23802 | -0.37664 | 0.16012  |
| H | H | -0.22462 | -0.43092 | 0.15237  |
| H | H | -0.25973 | -0.23916 | 0.13869  |
| H | H | -0.29489 | -0.22043 | 0.10669  |
| H | H | -0.29458 | -0.26266 | 0.16093  |
| H | H | -0.33848 | -0.21062 | 0.04505  |
| H | H | -0.44473 | -0.11815 | 0.19057  |
| H | H | -0.47804 | -0.11111 | 0.14415  |
| H | H | -0.46335 | -0.16364 | 0.16149  |
| H | H | 0.03504  | 0.34251  | 0.11841  |
| H | H | -0.00797 | 0.39878  | 0.11977  |
| H | H | -0.09808 | 0.49780  | 0.14159  |
| H | H | 0.18095  | -0.29488 | 0.30390  |
| H | H | 0.19269  | -0.24892 | 0.26193  |
| H | H | 0.15369  | -0.25462 | 0.28329  |
| H | H | 0.20179  | -0.17197 | 0.16470  |
| H | H | 0.23918  | -0.19228 | 0.18055  |
| H | H | 0.23216  | -0.13617 | 0.17477  |
| H | H | 0.30734  | -0.12843 | 0.07062  |
| H | H | 0.42347  | 0.03110  | 0.10407  |
| H | H | 0.38484  | 0.03021  | 0.12855  |
| H | H | 0.41300  | -0.00089 | 0.16879  |
| H | H | -0.41463 | 0.06168  | 0.05945  |

|   |   |          |          |          |
|---|---|----------|----------|----------|
| H | H | -0.46682 | 0.02529  | 0.04818  |
| N | N | 0.10034  | 0.33027  | 0.09777  |
| N | N | 0.34620  | 0.09939  | 0.00000  |
| N | N | -0.36022 | 0.15915  | 0.08558  |
| N | N | -0.13274 | 0.40877  | 0.13789  |
| N | N | -0.15577 | -0.39021 | 0.05804  |
| N | N | -0.39969 | -0.14856 | 0.03909  |
| N | N | 0.14437  | -0.33570 | 0.14923  |
| N | N | 0.37576  | -0.07865 | 0.04805  |
| O | O | 0.14440  | 0.28917  | 0.11488  |
| O | O | 0.08505  | 0.27651  | 0.16283  |
| O | O | 0.07799  | 0.34636  | 0.18892  |
| O | O | 0.17227  | 0.24994  | 0.03694  |
| O | O | 0.22224  | 0.19543  | 0.07430  |
| O | O | 0.38900  | 0.05162  | -0.00383 |
| O | O | 0.33698  | 0.03668  | 0.05213  |
| O | O | 0.29817  | 0.08041  | 0.02179  |
| O | O | -0.39999 | 0.11200  | 0.10754  |
| O | O | -0.37965 | 0.17484  | 0.18136  |
| O | O | -0.32922 | 0.17928  | 0.16290  |
| O | O | -0.26861 | 0.31766  | 0.10341  |
| O | O | -0.21661 | 0.35451  | 0.07784  |
| O | O | -0.17586 | 0.36495  | 0.15258  |
| O | O | -0.15004 | 0.41162  | 0.23731  |
| O | O | -0.10565 | 0.44235  | 0.21141  |
| O | O | -0.11479 | -0.44043 | 0.07450  |
| O | O | -0.16639 | -0.43791 | 0.13656  |
| O | O | -0.19821 | -0.38298 | 0.11533  |
| O | O | -0.27952 | -0.28109 | 0.07714  |
| O | O | -0.32775 | -0.23465 | 0.01822  |
| O | O | -0.35366 | -0.17949 | 0.07456  |
| O | O | -0.40572 | -0.17444 | 0.13719  |
| O | O | -0.44042 | -0.12767 | 0.09633  |
| O | O | 0.10926  | -0.38811 | 0.18159  |
| O | O | 0.13159  | -0.32792 | 0.25156  |
| O | O | 0.17055  | -0.29166 | 0.21088  |
| O | O | 0.21103  | -0.34709 | 0.01474  |
| O | O | 0.23318  | -0.16638 | 0.09311  |
| O | O | 0.28691  | -0.13798 | 0.05176  |
| O | O | 0.33528  | -0.11454 | 0.09665  |
| O | O | 0.37028  | -0.05467 | 0.14807  |
| O | O | 0.40173  | -0.02242 | 0.08140  |
| S | S | 0.28500  | 0.16368  | 0.04147  |
| S | S | -0.31503 | 0.24321  | 0.07285  |
| S | S | -0.21811 | -0.32031 | 0.06087  |
| S | S | 0.05465  | 0.43478  | 0.02836  |
| S | S | -0.05368 | 0.42511  | 0.04771  |
| S | S | 0.18777  | -0.24491 | 0.10716  |
| S | S | -0.55343 | 0.05610  | -0.07600 |
| H | H | 0.19344  | -0.36417 | 0.02416  |
| H | H | -0.30162 | 0.15198  | -0.07005 |
